# Supplementary material for: Propofol Inhibits Microglial Activation via miR-106b/Pi3k/Akt Axis
Source: Front Cell Neurosci. 2021 Oct 28;15:768364. doi: 10.3389/fncel.2021.768364 (PMC8581742; doi:10.3389/fncel.2021.768364)
Supplement: Supplementary file 4 [file Table_4.XLSX]

## Sheet: Myd88
Control	LPS	LPS+Ppf50	LPS+Ppf50-miR106
0.952638	2.01391	1.25864	2.8
1.06437	2.48452	1.41421	2.25012
0.97942	2.31039	1.29005	2.21914

## Sheet: Irf3
Control	LPS	LPS+Ppf50	LPS+Ppf50-miR106
1.00538	1.89534	1.33508	2.10583
1.03578	2.05124	1.00531	1.83558
0.965324	1.89454	1.06484	1.99538

## Sheet: Ticam
Control	LPS	LPS+Ppf50	LPS+Ppf50-miR106
1.09429	2.05623	1.21713	2.17347
0.870551	2.04202	1.39211	2.11404
1.04972	2.11404	1.35318	2.09943

## Sheet: Nos2
Control	LPS	LPS+Pro	LPS+Pro-miR-106	LPS+Pro-miR-124	LPS+Pro-miR-185	LPS+Pro-miR-9
1.34723	230.72	120.259	188.707	117.784	158.683	126.238
0.939523	227.544	148.056	177.294	137.187	153.277	125.366
0.790041	203.657	150.123	190.019	124.5	165.421	127.116

## Sheet: Tnf
Control	LPS	LPS+Pro	LPS+Pro-miR-106	LPS+Pro-miR-124	LPS+Pro-miR-185	LPS+Pro-miR-9
0.959264	7.81065	6.32108	9.71269	9.38268	7.63383	7.57419
0.986233	7.51618	6.01168	10.9588	8.05611	7.05564	7.21
1.04972	8.11168	6.08959	11.1579	9.51366	7.75435	7.51496
